# Supplementary material for: Development and evaluation of a quality improvement educational video on joint contractures for care home staff
Source: PubMed Central journal article supplement (PMC11683971; doi:10.1136/bmjoq-2024-002923), 2024-12-27

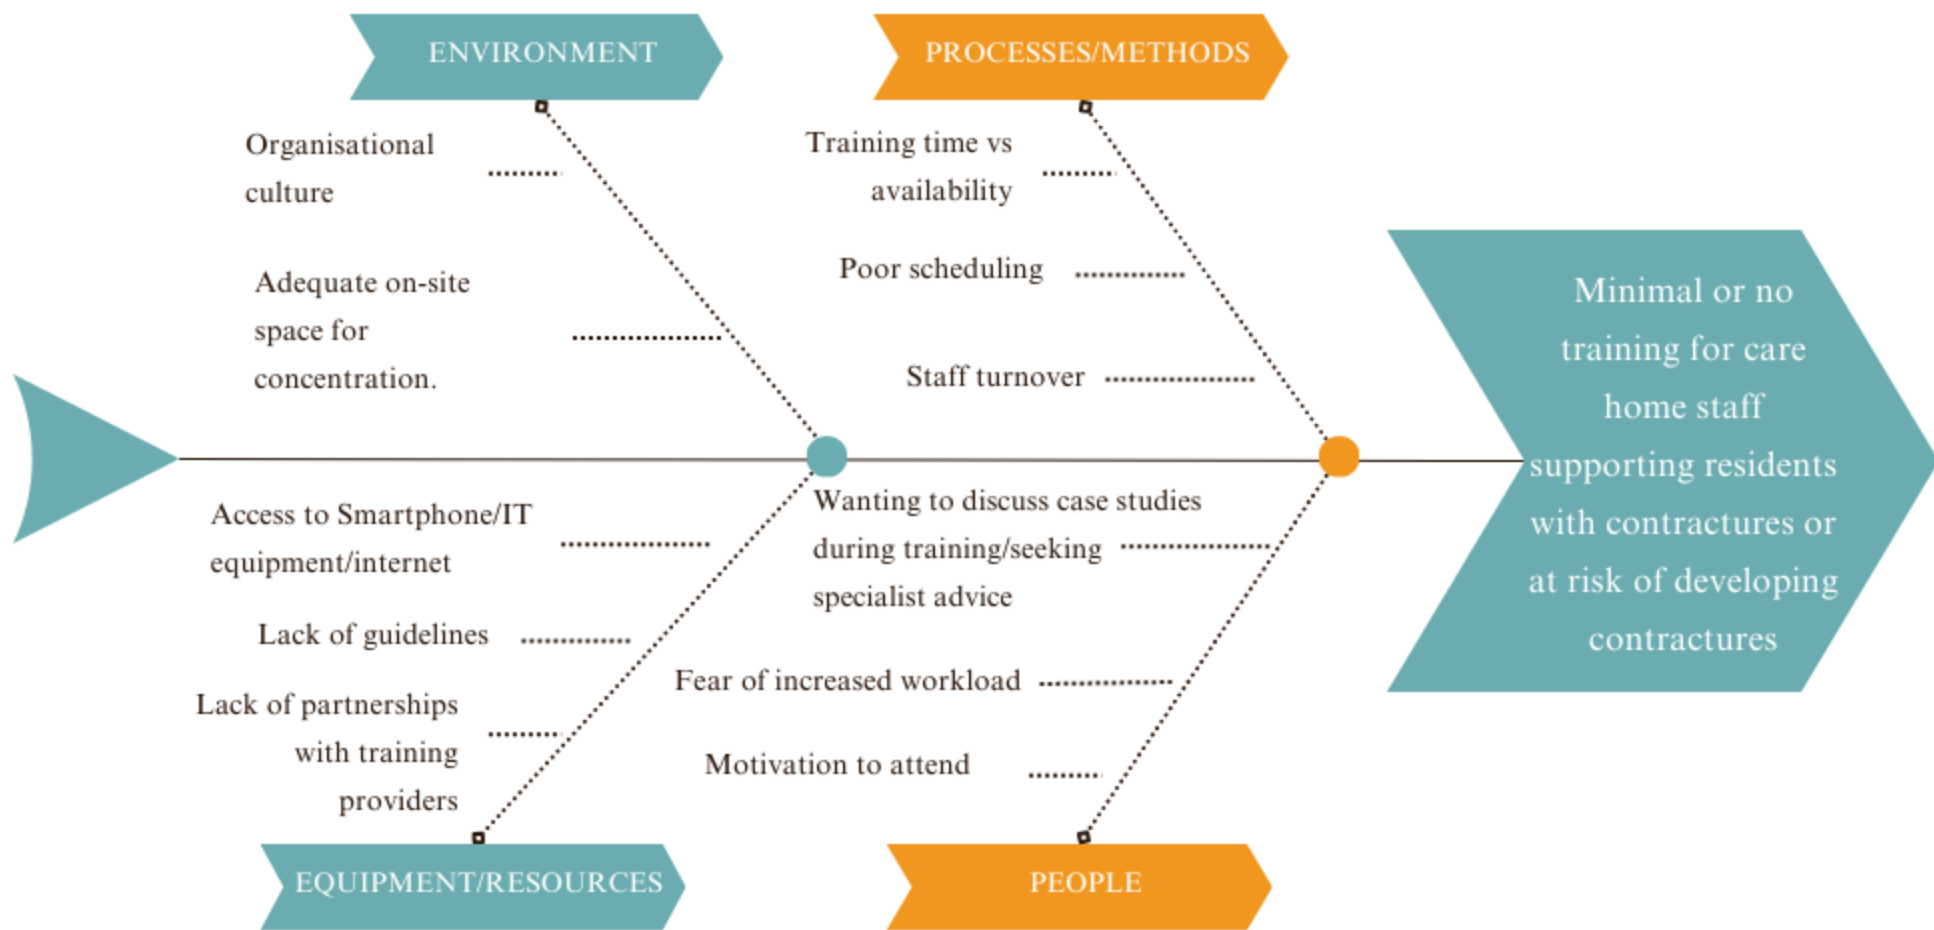

Supplement: bmjoq-13-4-s001.pdf [file bmjoq-13-4-s001.pdf]
